# Supplementary material for: Geographically Disperse, Culturable Seed-Associated Microbiota in Forage Plants of Alfalfa (Medicago sativa L.) and Pitch Clover (Bituminaria bituminosa L.): Characterization of Beneficial Inherited Strains as Plant Stress-Tolerance Enhancers
Source: Biology (Basel). 2022 Dec 16;11(12):1838. doi: 10.3390/biology11121838 (PMC9775229; doi:10.3390/biology11121838)
Supplement: Supplementary file 1 [file biology-11-01838-s001.zip › Supplementary Figures.pdf]

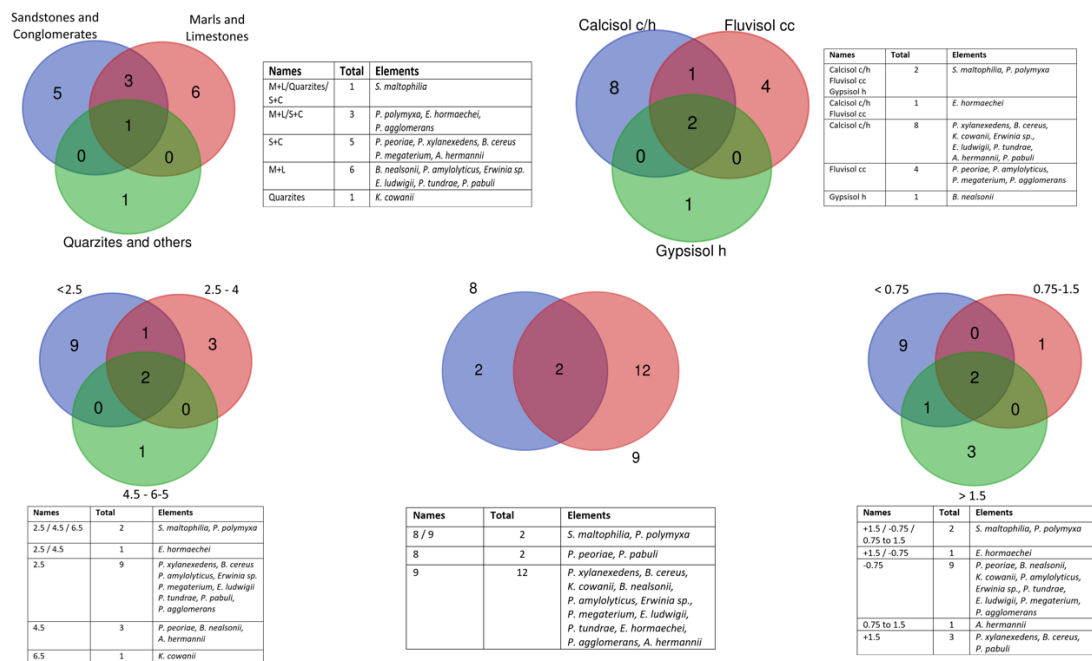

Supplementary Figure S1. Venn diagram for soil traits and bacteria species.

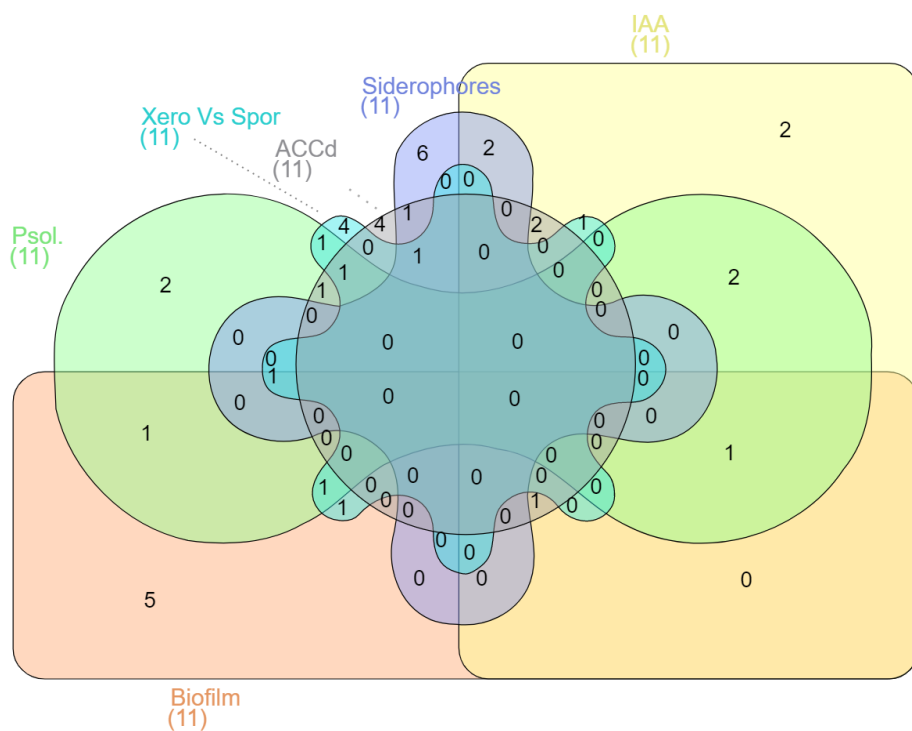

Supplementary Figure S2. Venn diagram for candidate selection criteria
