# Supplementary material for: Geographically Disperse, Culturable Seed-Associated Microbiota in Forage Plants of Alfalfa (Medicago sativa L.) and Pitch Clover (Bituminaria bituminosa L.): Characterization of Beneficial Inherited Strains as Plant Stress-Tolerance Enhancers
Source: Biology (Basel). 2022 Dec 16;11(12):1838. doi: 10.3390/biology11121838 (PMC9775229; doi:10.3390/biology11121838)
Supplement: Supplementary file 1 [file biology-11-01838-s001.zip › Supplementary Table S1.pdf]

**Supplementary Table S1. Control strains for plant growth-promoting and drought resistance screening tests.** 'Auxins' stand for auxins production; 'Biofilm', for biofilm structures production; 'ACCd', for the growth in ACC medium to determinate ACC deaminase production; 'P sol.', for phosphate solubilization; 'Sideroph.', for siderophores production; 'Sporul.', for sporulation; and 'Xerotol.', for xerotolerance. Values after '±' indicates standard deviation of recorded values.

| Control strain                   | Test         |             |             |        |           |         |          |
|----------------------------------|--------------|-------------|-------------|--------|-----------|---------|----------|
|                                  | Auxins       | Biofilm     | ACCd        | P sol. | Sideroph. | Sporul. | Xerotol. |
| <i>Escherichia coli</i> MC4100   | 1.01 ± 0.05  | 0.22 ± 0.02 | 0.07 ± 0.01 | (-)    | (-)       | (-)     | (-)      |
| <i>Pseudomonas putida</i> KT2440 | 25.11 ± 0.47 | 0.83 ± 0.11 | 0.44 ± 0.03 | (+)    | (+)       | (-)     | (-)      |
